# Supplementary material for: Patients With LDLR and PCSK9 Gene Variants Experienced Higher Incidence of Cardiovascular Outcomes in Heterozygous Familial Hypercholesterolemia
Source: PubMed Central journal article supplement — J Am Heart Assoc. 2021 Feb 3;10(4):e018263. doi: 10.1161/JAHA.120.018263 (PMC7955325; doi:10.1161/jaha.120.018263), 2021-02-03
Supplement: JAH3-10-e018263-s001.pdf [file JAH3-10-e018263-s001.pdf]

# **SUPPLEMENTAL MATERIAL**

¥

**Table S1. Summary of Primary and Secondary Outcomes and the Percentage of Events Before the Diagnosis of FH.**

|                                                                                  | All patients<br>(n=232) | Patients with<br><i>LDLR</i> gene<br>variant (n=183) | Patients with<br><i>PCSK9</i> gene<br>variant (n=35) | Patients with<br><i>LDLR/PCSK9</i> gene<br>variants (n=14) |
|----------------------------------------------------------------------------------|-------------------------|------------------------------------------------------|------------------------------------------------------|------------------------------------------------------------|
| Primary outcome: Non-fatal MI                                                    |                         |                                                      |                                                      |                                                            |
| Subjects who experienced events in lifetime, n (%)                               | 39 (17)                 | 30 (16)                                              | 3 (9)                                                | 6 (43)                                                     |
| Subjects who experienced events after FH diagnosis, n (%)                        | 7 (3)                   | 5 (3)                                                | 0 (0)                                                | 2 (14)                                                     |
| Subjects who experienced events before FH diagnosis, n (%)                       | 32 (14)                 | 25 (13)                                              | 3 (9)                                                | 4 (29)                                                     |
| Subjects who occurred events<br>both before and after FH diagnosis, n (%)        | 0 (0)                   | 0 (0)                                                | 0 (0)                                                | 0 (0)                                                      |
| % of events before FH diagnosis in their lifetime, %                             | 82                      | 83                                                   | 100                                                  | 67                                                         |
| Secondary outcome: A composite of non-fatal MI and coronary<br>revascularization |                         |                                                      |                                                      |                                                            |
| Subjects who experienced events in lifetime, n (%)                               | 69 (30)                 | 55 (30)                                              | 7 (20)                                               | 7 (50)                                                     |
| Subjects who experienced events after FH diagnosis, n (%)                        | 53 (23)                 | 42 (23)                                              | 5 (14)                                               | 6 (43)                                                     |
| Subjects who experienced events before FH diagnosis, n (%)                       | 27 (12)                 | 21 (11)                                              | 3 (9)                                                | 3 (21)                                                     |
| Subjects who occurred events<br>both before and after FH diagnosis, n (%)        | 11 (5)                  | 8 (4)                                                | 1 (3)                                                | 2 (4)                                                      |
| % of events before FH diagnosis, %                                               | 39                      | 38                                                   | 43                                                   | 43                                                         |

Categorical variables were expressed as n (%).

FH = familial hypercholesterolemia, *LDLR* = low-density lipoprotein receptor, MI = myocardial infarction, *PCSK9* = proprotein convertase subtilisin/kexin type 9.

**Table S2. Gene Variants Detected in Patients with *LDLR* and *PCSK9* Gene Variants.**

| <i>LDLR</i>       |                    | <i>PCSK9</i>      |                   | N |
|-------------------|--------------------|-------------------|-------------------|---|
| Nucleotide change | Effect of protein  | Nucleotide change | Effect of protein |   |
| ex 2-6 dup        |                    | c.94G > A         | p.(Glu32Lys)      | 1 |
| c.68-1G>C         | Splicing error     | c.10G > A         | p.(Val4Ile)       | 1 |
| c.418G>A          | p.(Glu140Lys)      | c.94G > A         | p.(Glu32Lys)      | 1 |
| c.478T>C          | p.(Cys160Arg)      | c.10G > A         | p.(Val4Ile)       | 1 |
| c.667_680dup      | p.(Asp227Glufs*43) | c.10G > A         | p.(Val4Ile)       | 1 |
| c.888C>A          | p.(Cys296*)        | c.10G > A         | p.(Val4Ile)       | 1 |
| c.888C>A          | p.(Cys296*)        | c.94G > A         | p.(Glu32Lys)      | 1 |
| c.1124A>G         | p.(Tyr375Cys)      | c.10G > A         | p.(Val4Ile)       | 1 |
| c.1147T>G         | p.(Phe383Val)      | c.10G > A         | p.(Val4Ile)       | 1 |
| c.1297G>C         | p.(Asp433His)      | c.10G > A         | p.(Val4Ile)       | 1 |
| c.1502C>T         | p.(Ala501Val)      | c.94G > A         | p.(Glu32Lys)      | 1 |
| c.1618G>A         | p.(Ala540Thr)      | c.10G > A         | p.(Val4Ile)       | 1 |
| c.1845+2T>C       | Splicing error     | c.94G > A         | p.(Glu32Lys)      | 1 |
| c.2389G>A         | p.(Val797Met)      | c.10G > A         | p.(Val4Ile)       | 1 |

*LDLR* = low-density lipoprotein receptor, N = number, *PCSK9* = proprotein convertase subtilisin/kexin type 9.

**Table S3. Included *LDLR* Gene Variants.**

| Exon No. | Genomic location GRCh38 (Chr19) | Nucleotide change | Effect of protein  | ClinVar                                      | CADD score | rs number   | Variant rating according to ACMG guideline | N |
|----------|---------------------------------|-------------------|--------------------|----------------------------------------------|------------|-------------|--------------------------------------------|---|
| 1        | 11089567                        | c.20_21del        | p.(Lys71Ilefs*44)  | N/A                                          | N/A        | N/A         | Pathogenic                                 | 2 |
| 1        | 11100222                        | c.68-1G>C         | Splicing error     | Pathogenic                                   | 29.8       | rs879254397 | Pathogenic                                 | 4 |
| 2        | 11100249                        | c.94_111del       | p.(Phe32_Gly37del) | N/A                                          | N/A        | N/A         | Likely pathogenic                          | 1 |
| 2        | 11100294                        | c.139G>A          | p.(Asp47Asn)       | Conflicting interpretations of pathogenicity | 25.6       | rs778284147 | Uncertain significance                     | 1 |
| 3        | 11102756                        | c.283T>G          | p.(Cys95Gly)       | Conflicting interpretations of pathogenicity | 25.5       | rs879254456 | Likely pathogenic                          | 2 |
| 3        | 11102757                        | c.284G>T          | p.(Cys95Phe)       | Pathogenic/<br>Likely pathogenic             | 25.7       | rs879254457 | Uncertain significance                     | 1 |
| 3        | 11102758                        | c.285C>A          | p.(Cys95*)         | Pathogenic                                   | 21.3       | rs139400379 | Pathogenic                                 | 1 |
| 3        | 11102774                        | c.301G>A          | p.(Glu101Lys)      | Pathogenic/Likely pathogenic                 | 25.2       | rs144172724 | Likely pathogenic                          | 1 |
| 3        | 11102788                        | c.313+2dup        | Splicing error     | Pathogenic/Likely pathogenic                 | N/A        | rs875989897 | Pathogenic                                 | 1 |
| 4        | 11105250                        | c.344G>A          | p.(Arg115His)      | Conflicting interpretations of pathogenicity | 22.5       | rs201102461 | Uncertain significance                     | 4 |
| 4        | 11105295                        | c.389dup          | p.(Asp131Argfs*49) | Pathogenic                                   | N/A        | rs879254510 | Pathogenic                                 | 4 |
| 4        | 11105301                        | c.395G>A          | p.(Arg132Gln)      | N/A                                          | 0.044      | rs751519676 | Uncertain significance                     | 1 |
| 4        | 11105314                        | c.408del          | p.(Asp136Glufs*70) | N/A                                          | N/A        | N/A         | Pathogenic                                 | 1 |
| 4        | 11105324                        | c.418G>A          | p.(Glu140Lys)      | Pathogenic/Likely pathogenic                 | 26.6       | rs748944640 | Pathogenic                                 | 4 |
| 4        | 11105364                        | c.458T>C          | p.(Phe153Ser)      | N/A                                          | 25.5       | N/A         | Uncertain significance                     | 1 |

|   |          |              |                      |                                              |       |                  |                        |    |
|---|----------|--------------|----------------------|----------------------------------------------|-------|------------------|------------------------|----|
| 4 | 11105384 | c.478T>C     | p.(Cys160Arg)        | Pathogenic/Likely pathogenic                 | 26.0  | rs879254540      | Likely pathogenic      | 3  |
| 4 | 11105406 | c.500G>A     | p.(Cys167Tyr)        | Likely pathogenic                            | 24.9  | rs879254548      | Uncertain significance | 1  |
| 4 | 11105436 | c.530C>T     | p.(Ser177Leu)        | Pathogenic/Likely pathogenic                 | 24.7  | rs121908026      | Pathogenic             | 3  |
| 4 | 11105560 | c.654_682del | p.(Pro220Lysfs*10)   | N/A                                          | N/A   | N/A              | Pathogenic             | 3  |
| 4 | 11105567 | c.661G>T     | p.(Asp221Tyr)        | Pathogenic/Likely pathogenic                 | 26.3  | rs875989906      | Likely pathogenic      | 1  |
| 4 | 11105573 | c.667_680dup | p.(Asp227Glufs*43)   | N/A                                          | N/A   | N/A              | Pathogenic             | 1  |
| 4 | 11105576 | c.670_682dup | p.(Glu228Glyfs*4)    | N/A                                          | N/A   | N/A              | Pathogenic             | 1  |
| 4 | 11105579 | c.673_681dup | p.(Lys225_Asp227dup) | Likely pathogenic                            | N/A   | rs155580342<br>5 | Likely pathogenic      | 2  |
| 4 | 11105587 | c.681C>A     | p.(Asp227Glu)        | Pathogenic                                   | 18.28 | rs121908028      | Pathogenic             | 2  |
| 4 | 11105588 | c.682G>A     | p.(Glu228Lys)        | Pathogenic/Likely pathogenic                 | 27.0  | rs121908029      | Pathogenic             | 3  |
| 5 | 11106666 | c.796G>A     | p.(Asp266Asn)        | Pathogenic/Likely pathogenic                 | 27.5  | rs875989907      | Likely pathogenic      | 1  |
| 6 | 11107461 | c.888G>A     | p.(Cys296*)          | Pathogenic                                   | 25.3  | rs879254708      | Pathogenic             | 6  |
| 7 | 11110685 | c.974G>A     | p.(Cys325Tyr)        | Likely pathogenic                            | 25.7  | rs879254746      | Uncertain significance | 1  |
| 7 | 11110723 | c.1012T>A    | p.(Cys338Ser)        | Pathogenic/Likely pathogenic                 | 24.8  | rs879254753      | Pathogenic             | 19 |
| 7 | 11110766 | c.1055G>A    | p.(Cys352Tyr)        | Pathogenic/Likely pathogenic                 | 29.1  | rs193922566      | Likely pathogenic      | 1  |
| 8 | 11111515 | c.1062dup    | p.(Ile355Tyrfs*3)    | Pathogenic                                   | N/A   | rs879254775      | Pathogenic             | 1  |
| 8 | 11111519 | c.1066G>C    | p.(Asp356His)        | Conflicting interpretations of pathogenicity | 24.1  | rs767767730      | Uncertain significance | 1  |
| 8 | 11111522 | c.1069G>T    | p.(Glu357*)          | N/A                                          | 41    | N/A              | Pathogenic             | 1  |
| 8 | 11111577 | c.1124A>G    | p.(Tyr375Cys)        | Pathogenic/Likely pathogenic                 | 24.4  | rs879254800      | Likely pathogenic      | 1  |
| 8 | 11111600 | c.1147T>G    | p.(Phe383Val)        | N/A                                          | 27.9  | N/A              | Uncertain significance | 3  |
| 9 | 11113298 | c.1207T>C    | p.(Phe403Leu)        | Likely pathogenic                            | 26.7  | rs879254831      | Likely pathogenic      | 3  |
| 9 | 11113307 | c.1216C>T    | p.(Arg406Trp)        | Pathogenic/Likely pathogenic                 | 26.4  | rs121908043      | Likely pathogenic      | 2  |

|    |          |                |                      |                                              |       |             |                        |    |
|----|----------|----------------|----------------------|----------------------------------------------|-------|-------------|------------------------|----|
| 9  | 11113343 | c.1252G>A      | p.(Glu418Lys)        | Likely pathogenic                            | 25.6  | rs869320651 | Uncertain significance | 1  |
| 9  | 11113354 | c.1263C>A      | p.(Ser421Arg)        | N/A                                          | 14.08 | rs752942769 | Uncertain significance | 1  |
| 9  | 11113356 | c.1265T>G      | p.(Leu422Arg)        | N/A                                          | 28.9  | N/A         | Uncertain significance | 2  |
| 9  | 11113388 | c.1297G>C      | p.(Asp433His)        | Pathogenic/Likely pathogenic                 | 31    | rs121908036 | Pathogenic             | 8  |
| 10 | 11113571 | c.1395T>G      | p.(Tyr465*)          | N/A                                          | 35    | N/A         | Pathogenic             | 1  |
| 10 | 11113645 | c.1469G>A      | p.(Trp490*)          | Pathogenic                                   | 43    | rs875989922 | Pathogenic             | 1  |
| 10 | 11113653 | c.1477_1488del | p.(Ser493_Gly496del) | N/A                                          | N/A   | N/A         | Likely pathogenic      | 1  |
| 10 | 11113678 | c.1502C>T      | p.(Ala501Val)        | Conflicting interpretations of pathogenicity | 23.7  | rs755667663 | Uncertain significance | 1  |
| 10 | 11113743 | c.1567G>A      | p.(Val523Met)        | Pathogenic/Likely pathogenic                 | 29.8  | rs28942080  | Likely pathogenic      | 1  |
| 10 | 11113763 | c.1586+1G>A    | Splicing error       | Pathogenic/Likely pathogenic                 | 34    | rs755389753 | Pathogenic             | 3  |
| 11 | 11116125 | c.1618G>A      | p.(Ala540Thr)        | Pathogenic/Likely pathogenic                 | 26.7  | rs769370816 | Uncertain significance | 2  |
| 11 | 11116209 | c.1702C>G      | p.(Leu568Val)        | Pathogenic/Likely pathogenic                 | 24.3  | rs746959386 | Pathogenic             | 8  |
| 12 | 11116883 | c.1730G>A      | p.(Trp577*)          | Pathogenic                                   | 49    | rs138947766 | Pathogenic             | 1  |
| 12 | 11116900 | c.1747C>T      | p.(His583Tyr)        | Conflicting interpretations of pathogenicity | 24.7  | rs730882109 | Uncertain significance | 1  |
| 12 | 11116936 | c.1783C>T      | p.(Arg595Trp)        | Conflicting interpretations of pathogenicity | 24.6  | rs373371572 | Likely pathogenic      | 3  |
| 12 | 11117000 | c.1845+2T>C    | Splicing error       | Pathogenic/Likely pathogenic                 | 33    | rs778408161 | Pathogenic             | 20 |
| 13 | 11120117 | c.1871_1873del | p.(Ile624del)        | Pathogenic/Likely pathogenic                 | N/A   | rs879255062 | Likely pathogenic      | 1  |
| 14 | 11120408 | c.2026G>A      | p.(Gly676Ser)        | Conflicting interpretations of pathogenicity | 25.7  | rs745753810 | Uncertain significance | 1  |

|    |          |                        |                     |                                              |       |             |                        |    |
|----|----------|------------------------|---------------------|----------------------------------------------|-------|-------------|------------------------|----|
| 14 | 11120424 | c.2042G>C              | p.(Cys681Ser)       | Likely pathogenic                            | 26.1  | rs201637900 | Uncertain significance | 1  |
| 14 | 11120436 | c.2054C>T              | p.(Pro685Leu)       | Pathogenic/Likely pathogenic                 | 24.9  | rs28942084  | Pathogenic             | 3  |
| 14 | 11120484 | c.2102del              | p.(Gly701Alafs*8)   | N/A                                          | N/A   | N/A         | Pathogenic             | 2  |
| 14 | 11123172 | c.2141-2delA           | Splicing error      | N/A                                          | N/A   | N/A         | Pathogenic             | 1  |
| 15 | 11128005 | c.2312-3C>A            | Splicing error      | Pathogenic/Likely pathogenic                 | 17.32 | rs875989942 | Pathogenic             | 5  |
| 16 | 11128085 | c.2389G>A              | p.(Val797Met)       | Conflicting interpretations of pathogenicity | 25.4  | rs750518671 | Likely pathogenic      | 4  |
| 17 | 11129539 | c.2416dup              | p.(Val806Glyfs*11)  | Conflicting interpretations of pathogenicity | N/A   | rs773618064 | Pathogenic             | 3  |
| 17 | 11129539 | c.2416_2418delinsAGAAG | p.(Val806Argfs*124) | N/A                                          | N/A   | N/A         | Pathogenic             | 2  |
| 17 | 11129554 | c.2431A>T              | p.(Lys811*)         | Pathogenic                                   | 43    | rs879255211 | Pathogenic             | 10 |
|    |          | ex1del                 |                     | Pathogenic                                   | N/A   | N/A         | Pathogenic             | 2  |
|    |          | ex2-3del               |                     | Pathogenic                                   | N/A   | N/A         | Pathogenic             | 4  |
|    |          | ex2-6dup               |                     | N/A                                          | N/A   | N/A         | Pathogenic             | 3  |
|    |          | ex5del                 |                     | Pathogenic                                   | N/A   | N/A         | Pathogenic             | 1  |
|    |          | ex7-18del              |                     | Pathogenic                                   | N/A   | N/A         | Pathogenic             | 2  |
|    |          | ex13-14del             |                     | Pathogenic                                   | N/A   | N/A         | Pathogenic             | 4  |
|    |          | ex13-14dup             |                     | Pathogenic                                   | N/A   | N/A         | Likely pathogenic      | 1  |
|    |          | ex16-18del             |                     | N/A                                          | N/A   | N/A         | Pathogenic             | 1  |
|    |          | ex17dup                |                     | N/A                                          | N/A   | N/A         | Likely pathogenic      | 1  |
|    |          | ex17-18del             |                     | Pathogenic                                   | N/A   | N/A         | Pathogenic             | 1  |

ACMG guideline = American College of Medical Genetics guideline, CADD score = Combined Annotation Dependent Depletion score, *LDLR* = low-density lipoprotein receptor, N = number, N/A = not applicable

**Table S4. Included *PCSK9* Gene Variants.**

| Exon No. | Genomic location GRCh38 (Chr1) | Nucleotide change | Effect of protein | ClinVar                                      | CADD score | rs number   | Variant rating according to ACMG | N  |
|----------|--------------------------------|-------------------|-------------------|----------------------------------------------|------------|-------------|----------------------------------|----|
| 1        | 55039847                       | c.10G > A         | p.(Val4Ile)       | Uncertain significance                       | 6.659      | rs186669805 | Benign                           | 16 |
| 1        | 55039931                       | c.94G > A         | p.(Glu32Lys)      | Conflicting interpretations of pathogenicity | 22.3       | rs564427867 | Pathogenic                       | 30 |
| 9        | 55058630                       | c.1486C > T       | p.(Arg496Trp)     | Uncertain significance                       | 23.3       | rs374603772 | Likely pathogenic                | 3  |

ACMG guideline = American College of Medical Genetics guideline, CADD score = Combined Annotation Dependent Depletion score, N = number, N/A = not applicable *PCSK9* = proprotein convertase subtilisin/kexin type 9.



**Table S5. Details of MACE.**

| Case No. | Age, y | Sex | Genotype          | MACE         | Cause of death | Culprit artery | Culprit site | Treatment Option |
|----------|--------|-----|-------------------|--------------|----------------|----------------|--------------|------------------|
| 1        | 46     | M   | <i>LDLR/PCSK9</i> | Non-fatal MI | -              | LAD            | #7           | PCI              |
| 2        | 37     | M   | <i>LDLR/PCSK9</i> | Non-fatal MI | -              | LAD            | #7           | PCI              |
| 3        | 36     | M   | <i>LDLR/PCSK9</i> | Non-fatal MI | -              | LCX            | #14          | MT               |
| 4        | 64     | M   | <i>LDLR/PCSK9</i> | Non-fatal MI | -              | RCA            | #2           | PCI              |
| 5        | 53     | M   | <i>LDLR/PCSK9</i> | Non-fatal MI | -              | RCA            | #1           | PCI              |
| 6        | 41     | M   | <i>LDLR/PCSK9</i> | Non-fatal MI | -              | RCA            | #1           | PCI              |
| 7        | 40     | M   | <i>LDLR</i>       | Non-fatal MI | -              | RCA            | #3           | PCI              |
| 8        | 51     | F   | <i>LDLR</i>       | Non-fatal MI | -              | LAD            | #6           | PCI              |
| 9        | 71     | F   | <i>LDLR</i>       | Non-fatal MI | -              | LAD            | #7           | PCI              |
| 10       | 62     | F   | <i>LDLR</i>       | Non-fatal MI | -              | LAD            | #6           | PCI              |
| 11       | 32     | F   | <i>LDLR</i>       | Non-fatal MI | -              | RCA            | #2           | PCI              |
| 12       | 48     | M   | <i>LDLR</i>       | Non-fatal MI | -              | LAD            | #7           | CABG             |
| 13       | 42     | M   | <i>LDLR</i>       | Non-fatal MI | -              | RCA            | #1           | PCI              |
| 14       | 39     | M   | <i>LDLR</i>       | Non-fatal MI | -              | RCA            | #1           | MT               |
| 15       | 59     | M   | <i>LDLR</i>       | Non-fatal MI | -              | RCA            | #2           | CABG             |
| 16       | 39     | M   | <i>LDLR</i>       | Non-fatal MI | -              | LAD            | N/A          | MT               |
| 17       | 55     | F   | <i>LDLR</i>       | Non-fatal MI | -              | LAD            | #7           | MT               |
| 18       | 48     | M   | <i>LDLR</i>       | Non-fatal MI | -              | RCA            | #2           | PCI              |
| 19       | 45     | M   | <i>LDLR</i>       | Non-fatal MI | -              | RCA            | #1, #13      | CABG             |
| 20       | 54     | M   | <i>LDLR</i>       | Non-fatal MI | -              | LCX            | #13          | MT               |
| 21       | 45     | M   | <i>LDLR</i>       | Non-fatal MI | -              | LCX            | #14          | CABG             |

|    |    |   |              |              |   |     |             |      |
|----|----|---|--------------|--------------|---|-----|-------------|------|
| 22 | 46 | M | <i>LDLR</i>  | Non-fatal MI | - | RCA | #2          | PCI  |
| 23 | 36 | M | <i>LDLR</i>  | Non-fatal MI | - | LAD | #7          | PCI  |
| 24 | 69 | F | <i>LDLR</i>  | Non-fatal MI | - | RCA | #2          | PCI  |
| 25 | 63 | M | <i>LDLR</i>  | Non-fatal MI | - | LCX | #13         | PCI  |
| 26 | 38 | M | <i>LDLR</i>  | Non-fatal MI | - | RCA | #3          | PCI  |
| 27 | 66 | M | <i>LDLR</i>  | Non-fatal MI | - | RCA | #3          | PCI  |
| 28 | 41 | M | <i>LDLR</i>  | Non-fatal MI | - | N/A | N/A         | MT   |
| 29 | 64 | M | <i>LDLR</i>  | Non-fatal MI | - | N/A | #6, #13, #3 | CABG |
| 30 | 32 | M | <i>LDLR</i>  | Non-fatal MI | - | LAD | #6          | PCI  |
| 31 | 30 | F | <i>LDLR</i>  | Non-fatal MI | - | RCA | #3          | PCI  |
| 32 | 31 | F | <i>LDLR</i>  | Non-fatal MI | - | LAD | #7          | PCI  |
| 33 | 43 | M | <i>LDLR</i>  | Non-fatal MI | - | LAD | #6          | PCI  |
| 34 | 75 | M | <i>LDLR</i>  | Non-fatal MI | - | RCA | #2          | MT   |
| 35 | 44 | M | <i>LDLR</i>  | Non-fatal MI | - | RCA | #1          | PCI  |
| 36 | 44 | M | <i>LDLR</i>  | Non-fatal MI | - | LAD | #7          | PCI  |
| 37 | 50 | M | <i>PCSK9</i> | Non-fatal MI | - | LAD | #6          | PCI  |
| 38 | 53 | M | <i>PCSK9</i> | Non-fatal MI | - | RCA | #4AV        | PCI  |
| 39 | 60 | M | <i>PCSK9</i> | Non-fatal MI | - | RCA | #3          | PCI  |

AV = atrioventricular, CABG = coronary artery bypass grafting, F = female, LAD = left anterior descending artery, LCX = left circumflex artery, *LDLR* = low-density lipoprotein receptor, M = male, MACE = major adverse cardiac events, MI = myocardial infarction, MT = medical treatment, No = number, RCA = right coronary artery, PCI = percutaneous coronary intervention, *PCSK9* = proprotein convertase subtilisin/kexin type 9

**Figure S1. Comparison of LDL-C in Patients with *LDLR* Gene Variants and/or *PCSK9* (p.Glu32Lys, p.Arg496Trp) Gene Variant.**

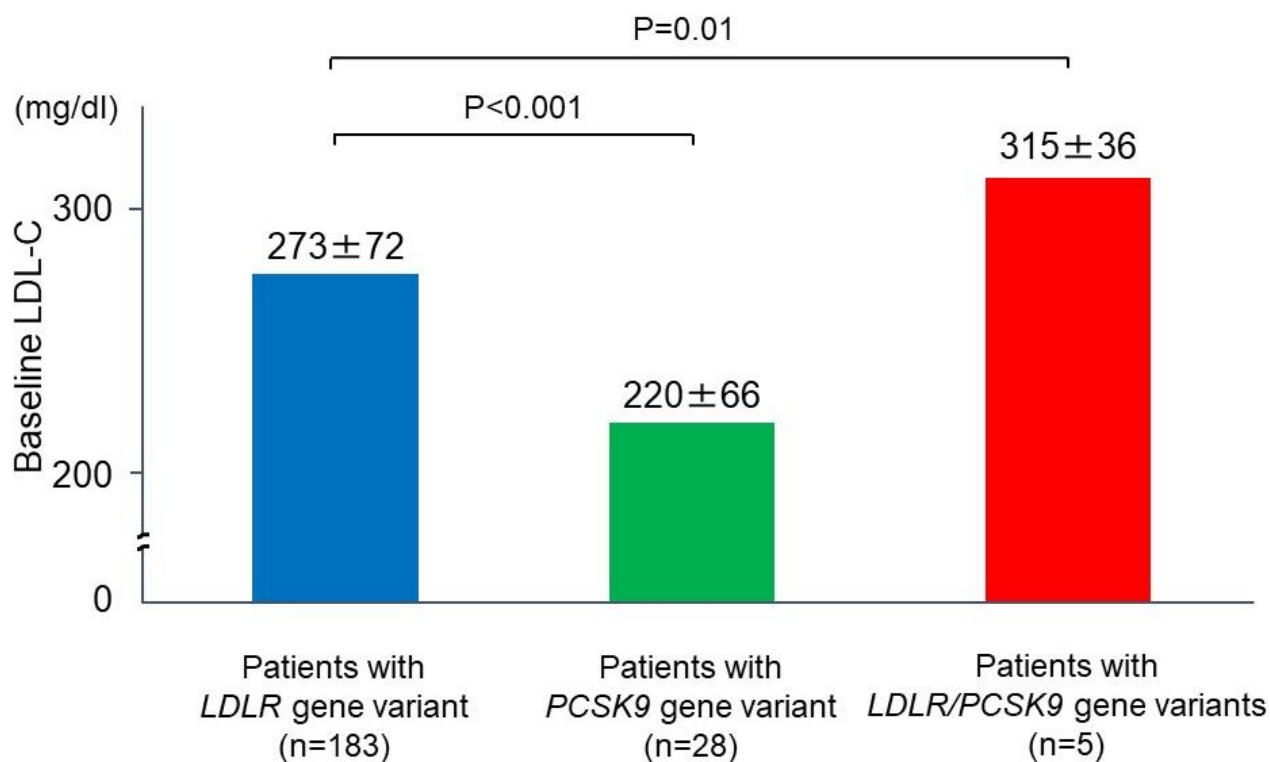

The levels of baseline LDL-C were shown. Blue, green, and red bars indicate the levels of baseline LDL-C in patients with *LDLR* gene variant, those with *PCSK9* gene variant, and those with *LDLR/PCSK9* gene variants, respectively.

LDL-C = low-density lipoprotein cholesterol, *LDLR* = low-density lipoprotein receptor,

*PCSK9* = proprotein convertase subtilisin/kexin type 9.

**Figure S2. Comparison of Prognostic Influence of Genotype in Patients with *LDLR* Gene Variants and/or *PCSK9* (p.Glu32Lys, p.Arg496Trp) Gene Variant.**

**a.**

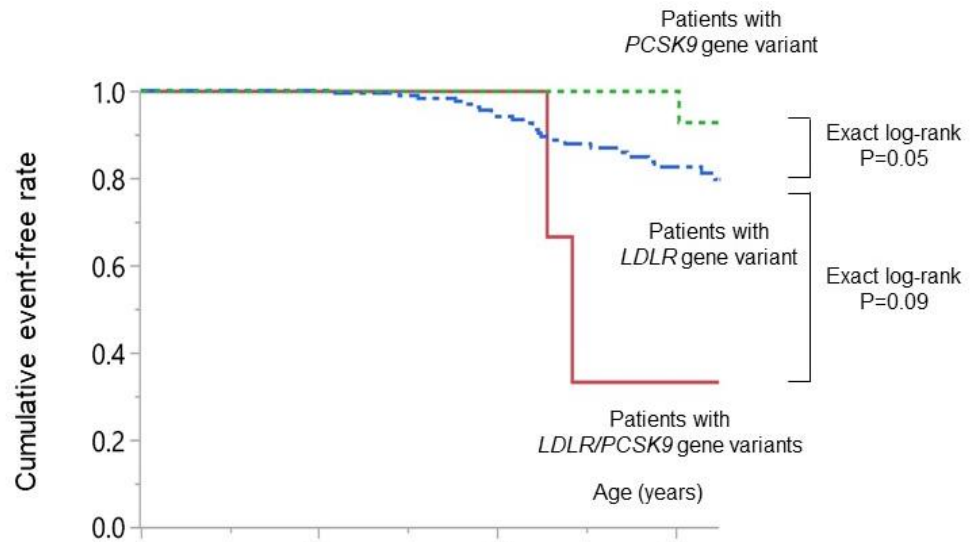

| Numbers at risk                               |     |     |     |    |
|-----------------------------------------------|-----|-----|-----|----|
| Patients with <i>LDLR/PCSK9</i> gene variants | 5   | 5   | 4   | 2  |
| Patients with <i>LDLR</i> gene variant        | 183 | 183 | 133 | 68 |
| Patients with <i>PCSK9</i> gene variant       | 28  | 28  | 24  | 15 |

**b.**

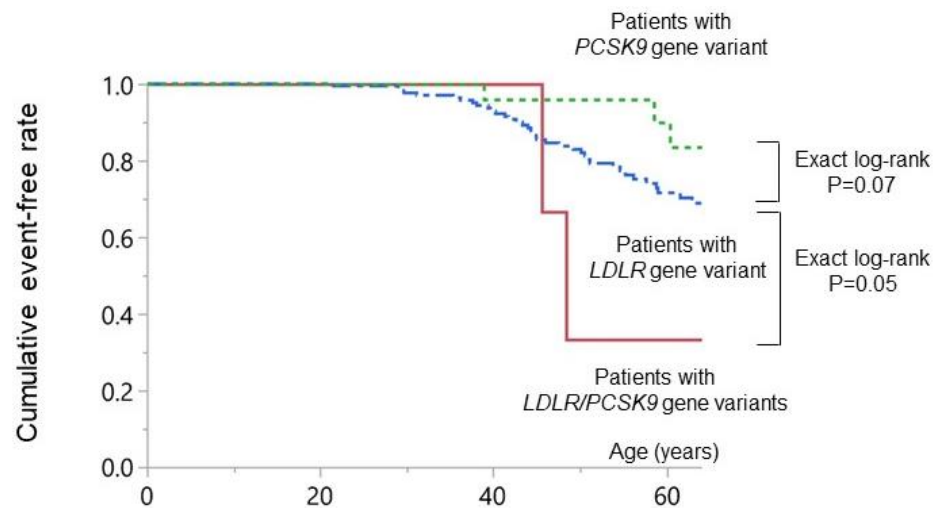

| Numbers at risk                               |     |     |     |    |
|-----------------------------------------------|-----|-----|-----|----|
| Patients with <i>LDLR/PCSK9</i> gene variants | 5   | 5   | 4   | 2  |
| Patients with <i>LDLR</i> gene variant        | 183 | 183 | 131 | 60 |
| Patients with <i>PCSK9</i> gene variant       | 28  | 28  | 24  | 15 |

Prognostic influence of genotype in FH patients on primary outcome (non-fatal MI) (a) and

secondary outcome (non-fatal MI, and coronary revascularization) (b). Solid red, blue dash-dotted, and green dotted lines indicate event-free survival curves for patients with *LDLR/PCSK9* gene variants, patients with *LDLR* gene variant, and patients with *PCSK9* gene variant, respectively.

FH = familial hypercholesterolemia, *LDLR* = low-density lipoprotein receptor, MI = myocardial infarction, *PCSK9* = proprotein convertase subtilisin/kexin type 9
